# Supplementary material for: New promising nanocatalysts: catalytic behavior of kaolinite/dimethyl sulfoxide, Al 2 O 3 and silica gel supported Pt nanocatalysts
Source: Research Square preprint supplement (doi:10.21203/rs.3.rs-8167544/v1), 2026-02-02
Supplement: Supplementary file 1 [file 00107d96b72fc2fb1c1965d1.docx]

**Table 1** BET surface area and composition of supports/nanocatalysts.

| Supports/  nanocatalysts | BET surface area,  m2/g | | | Pt loadig,  wt % |  |  |
| --- | --- | --- | --- | --- | --- | --- |
| SiO2 | | 230-280 - | | | | | |  | |
| Al2O3 | | | 250 - | | | | - | |
| Kaolinite | | 19 - | | | | | |  | |
| Pt/SiO2 | | 250 1 | | | | | |  | |
| Pt/Al2O3 | | 200 1 | | | | | |  | |
| Pt/kaolinite | | | 40 1 | | | |  | |
| Pt/kaolinite/DMSO | | 2.05 1 | | | | | |  | |

**Table 2** The values of enthalpy of soaking for kaolinite, Al2O3 and SiO2.

| Support | H2O | 1H2O:1DMSO  (v/v)  ΔsH, J/g | DMSO |
| --- | --- | --- | --- |
| Kaolinite | -1.94 | -3.34 | -4.94 |
| Al2O3 | -2.86 | -3.31 | -5.33 |
| SiO2 | -3.14 | -2.67 | -4.87 |
